# Supplementary material
Source: Springer Nature journal article supplement (https://www.springermedizin.de/resource/supplementary/12985_2012_2126_MOESM6_ESM.pdf/9606092)

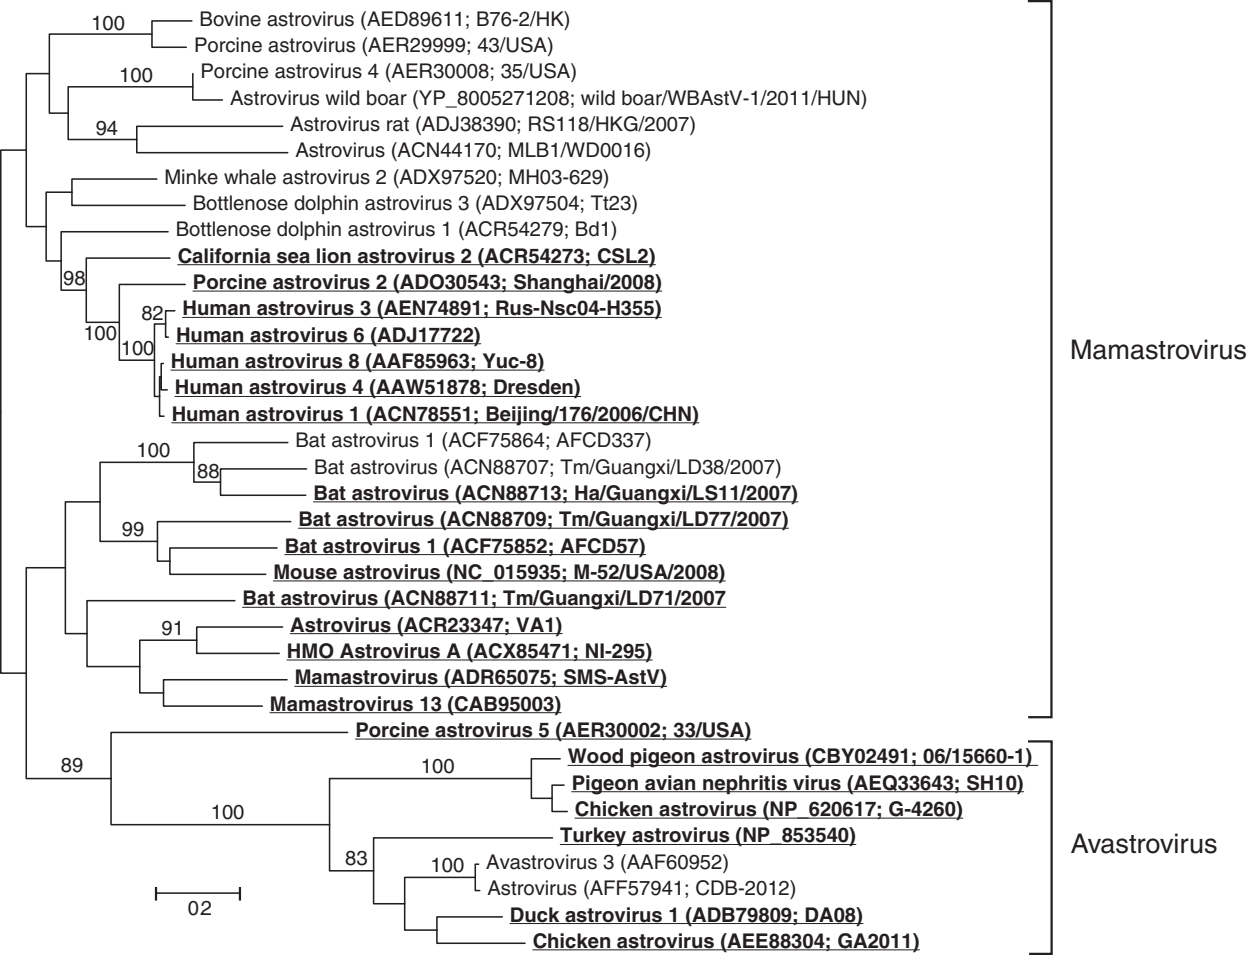

Supplement: MOESM6 [file 9606092]
